# Supplementary material
Source: MDPI journal article supplement (https://www.mdpi.com/2073-4395/12/11/2647)
Supplement: s1 [file s1]

## Supplementary Materials

**Table S1.** Primers for qRT-PCR analysis

| Gene ID              | Primer-F             | Primer-R             | annotation                       |
|----------------------|----------------------|----------------------|----------------------------------|
| <i>Smechr0302615</i> | GGAAGCAGATGGAAGTGATA | CAGGCGTTCTACAGCAAT   | Tubulin gamma                    |
| <i>Smechr0902429</i> | CGGCAACAGTAAGGATGAT  | CATAGCAAGTGTGAGCATTC | Auxin-responsive protein IAA13   |
| <i>Smechr0303536</i> | GGAGACTGGTCTTGTAATGA | GTTCTGTGCCGTTGATTG   | Auxin-responsive protein IAA26   |
| <i>Smechr0502523</i> | CCACCAATAAGGACTTACAG | GGCAATCCATCCATATTCAC | Auxin-responsive protein IAA12   |
| <i>Smechr0902295</i> | GTATGGTGGCACATCAGAA  | GAGTTGATTGAGGCAAAGC  | Auxin-responsive protein IAA4    |
| <i>Smechr0601560</i> | TGAATCTCAAGGCAACAGA  | CTCCATCCACGCTAACTT   | Auxin-responsive protein IAA4    |
| <i>Smechr0401946</i> | AGATGTCTGAAGATGAGGAG | AAGACTTCGGATCTGGTTAA | TIR1-like                        |
| <i>Smechr1102196</i> | CACAGCAGCAGAATGGTA   | AGATTGTTTCGTTGGCACTA | Auxin efflux carrier component 3 |
| <i>Smechr0500307</i> | TTATACAGCGAAGCCAGAG  | GCAGAAGACCATCAGTAGAA | COI1                             |
| <i>Smechr0101209</i> | AGATCGTTCAGGAAGAATGT | GCACCGTCAACACTAACT   | Auxin-responsive protein IAA16   |

**Table S2.** Summary of read numbers in WT and slf

| Sample name   | Raw reads | Clean reads | Mapped reads | Ratio of mapped reads (%) |
|---------------|-----------|-------------|--------------|---------------------------|
| <i>Slf</i> -1 | 51148600  | 50617052    | 48361989     | 95.54%                    |
| <i>Slf</i> -2 | 49568586  | 48796004    | 47173310     | 96.67%                    |
| <i>Slf</i> -3 | 40376430  | 39909264    | 38704900     | 96.98%                    |
| Wt-1          | 43405168  | 42718400    | 41437526     | 97.0%                     |
| Wt-2          | 40222242  | 39661428    | 38159781     | 96.21%                    |
| Wt-3          | 43418240  | 42854288    | 41164831     | 96.06%                    |



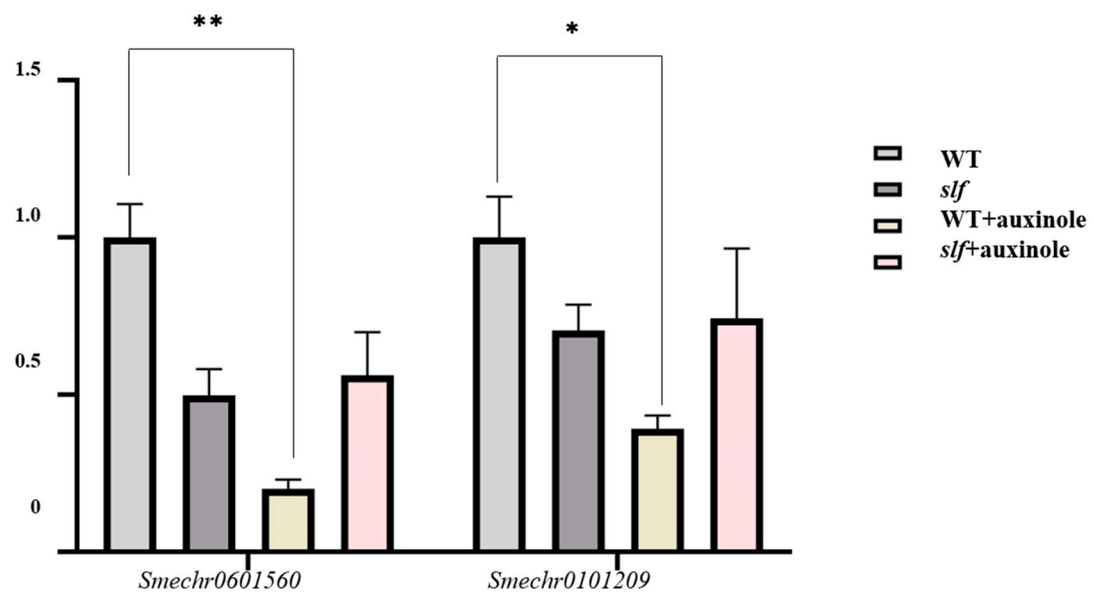

**Figure S1** Expression levels of some other auxin response genes after treatment with auxinole. The asterisks show significant differences (*t test*; \*,  $p < 0.05$ , \*\*  $p < 0.01$ ) between plants treated with control and auxinole.
